# Supplementary material for: Synthesis of a furfural-based DOPO-containing co-curing agent for fire-safe epoxy resins
Source: Royal Society of Chemistry journal article supplement (doi:10.1039/c9ra06425g), 2020-01-01
Supplement: c9ra06425g1.pdf [file c9ra06425g1.pdf]

## Supporting information

### Synthesis of a Furfural-Based DOPO-Containing Co-Curing Agent for Fire-Safe Epoxy Resins

WeiQi Xie<sup>‡a</sup>, Shiwen Huang<sup>‡a</sup>, Donglin Tang<sup>a</sup>, Shumei Liu<sup>\*ab</sup>, and Jianqing Zhao<sup>\*ab</sup>

<sup>a</sup>School of Materials Science and Engineering, South China University of  
Technology, Guangzhou, 510640, P. R. China

<sup>b</sup>Key Laboratory of Polymer Processing Engineering, Ministry of Education,  
Guangzhou 510640, P. R. China

<sup>‡</sup> These authors contributed equally to this work.

#### Corresponding authors

\*Tel./Fax: +86-13611400566. E-mail: liusm@scut.edu.cn (Shumei Liu)

\*Tel./Fax: +86-13609724000. E-mail: psjqzhao@scut.edu.cn (Jianqing Zhao)

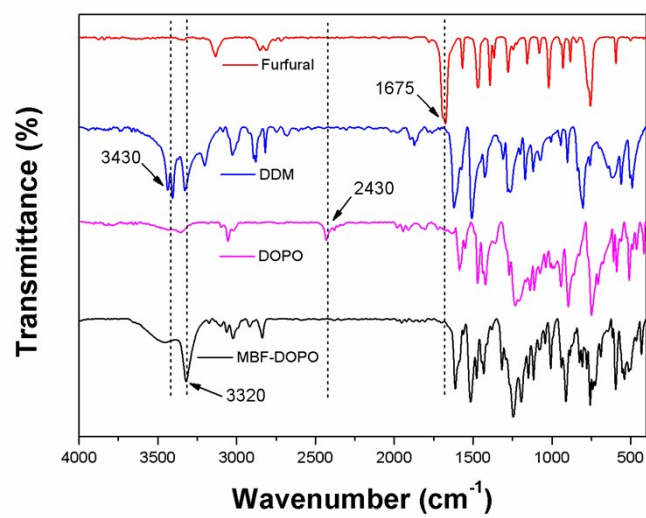

**Fig. S1** FTIR spectra of furfural, DDM, DOPO and MBF-DOPO

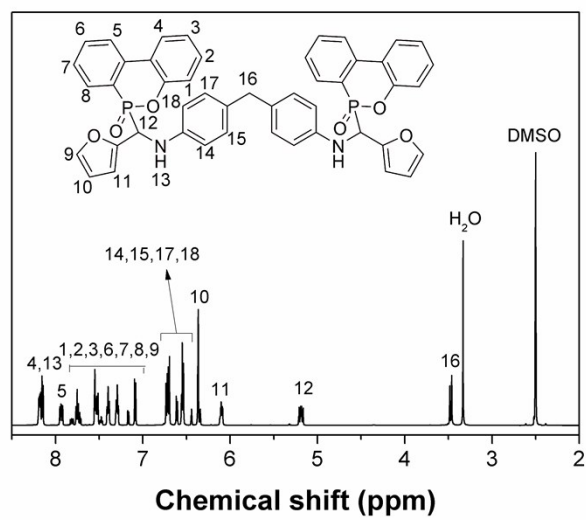

**Fig. S2** The assignment of peaks in the <sup>1</sup>H-NMR spectrum of MBF-DOPO

**Table S1** Exothermic peak temperatures of EP-0 and EP-4.0 cured at varying heating rates

| Samples | Heating rate<br>(°C/min) | $T_p$<br>(°C) |
|---------|--------------------------|---------------|
| EP-0    | 2.5                      | 129.1         |
|         | 5                        | 140.3         |
|         | 10                       | 156.3         |
|         | 15                       | 168.9         |
|         | 20                       | 177.6         |
| EP-4.0  | 2.5                      | 116.5         |
|         | 5                        | 129.4         |
|         | 10                       | 148           |
|         | 15                       | 159.3         |
|         | 20                       | 171.5         |

**Table S2** Apparent activation energy of curing reaction for EP-0 and EP-4.0

| Samples | $E_a$ (kJ/mol) | $R^2$ |
|---------|----------------|-------|
| EP-0    | 50.4±0.24      | 0.998 |
| EP-4.0  | 47.3±0.18      | 0.999 |

**Table S3** Cone calorimeter test results of EP-0 and EP-4.0

| Samples | $TTI$ (s) | $PHRR$ (kW/m <sup>2</sup> ) | $THR$ (MJ/m <sup>2</sup> ) | Residual mass (wt %) | $TSP$ (m <sup>2</sup> ) |
|---------|-----------|-----------------------------|----------------------------|----------------------|-------------------------|
| EP-0    | 50±2      | 962±12                      | 151±5                      | 17.9±0.3             | 140±3                   |
| EP-4.0  | 47±1      | 680±10                      | 132±4                      | 8.6±0.2              | 93±1                    |

**Table S4** XPS analysis of char residues after CCT

| Samples | C (wt %)   | O (wt %)   | N (wt %)  | P (wt %)  |
|---------|------------|------------|-----------|-----------|
| EP-0    | 80.87±0.18 | 14.92±0.13 | 4.21±0.06 | 0         |
| EP-4.0  | 83.77±0.21 | 12.23±0.11 | 3.68±0.05 | 0.32±0.02 |

**Table S5** Thermal properties of EP-0 and EP-4.0

| Samples | Nitrogen             |                      |                      |                | Air                  |                      |                      |                |
|---------|----------------------|----------------------|----------------------|----------------|----------------------|----------------------|----------------------|----------------|
|         | $T_{d\ 5\%}$<br>(°C) | $T_{d\ max}$<br>(°C) | $R_{max}$<br>(%/min) | Residue<br>(%) | $T_{d\ 5\%}$<br>(°C) | $T_{d\ max}$<br>(°C) | $R_{max}$<br>(%/min) | Residue<br>(%) |
| EP-0    | 387.9                | 400.7                | 36.5                 | 14.7           | 386.1                | 398.3                | 31.3                 | 1.93           |
| EP-4.0  | 366.7                | 385.7                | 27.4                 | 21.8           | 353.8                | 387.2                | 21.8                 | 2.07           |

**Table S6** Key results of EP-0 and EP-4.0 from DMA

| Samples | E' at 30 °C (GPa) | T <sub>g</sub> (°C) | v <sub>e</sub> (10 <sup>3</sup> mol/m <sup>3</sup> ) |
|---------|-------------------|---------------------|------------------------------------------------------|
| EP-0    | 2.89±0.03         | 162.2±1.22          | 5.05±0.10                                            |
| EP-4.0  | 3.05±0.04         | 159.5±1.57          | 4.99±0.17                                            |
